# Supplementary material for: Differences in cardiovascular risk factors associated with sex and gender identity, but not gender expression, in young, healthy cisgender adults
Source: Frontiers journal article supplement (doi:10.3389/fcvm.2024.1374765), 2024-09-05
Supplement: Data_Sheet_1.pdf [file Data_Sheet_1.pdf]

### Supplementary Table 1 – Bem Sex Role Inventory Questionnaire

The following table includes the Bem Sex Role Inventory – 30 Questionnaire.

“Rate yourself on each item below, on a scale of 1 (Never or almost never true) to 7 (Almost always true)”

|                                     | 1 –<br>Never/Almost<br>Never True | 2 | 3 | 4 | 5 | 6 | 7 - Almost<br>Always<br>True |
|-------------------------------------|-----------------------------------|---|---|---|---|---|------------------------------|
| Defend my own beliefs               |                                   |   |   |   |   |   |                              |
| Have leadership abilities           |                                   |   |   |   |   |   |                              |
| Affectionate                        |                                   |   |   |   |   |   |                              |
| Eager to soothe hurt feelings       |                                   |   |   |   |   |   |                              |
| Conscientious                       |                                   |   |   |   |   |   |                              |
| Secretive                           |                                   |   |   |   |   |   |                              |
| Independent                         |                                   |   |   |   |   |   |                              |
| Willing to take risks               |                                   |   |   |   |   |   |                              |
| Sympathetic                         |                                   |   |   |   |   |   |                              |
| Warm                                |                                   |   |   |   |   |   |                              |
| Moody                               |                                   |   |   |   |   |   |                              |
| Adaptable                           |                                   |   |   |   |   |   |                              |
| Assertive                           |                                   |   |   |   |   |   |                              |
| Dominant                            |                                   |   |   |   |   |   |                              |
| Sensitive to the needs of<br>others |                                   |   |   |   |   |   |                              |
|                                     | 1 –<br>Never/Almost<br>Never True | 2 | 3 | 4 | 5 | 6 | 7 - Almost<br>Always<br>True |
| Tender                              |                                   |   |   |   |   |   |                              |
| Reliable                            |                                   |   |   |   |   |   |                              |
| Conceited                           |                                   |   |   |   |   |   |                              |
| Strong personality                  |                                   |   |   |   |   |   |                              |
| Willing to take a stand             |                                   |   |   |   |   |   |                              |
| Understanding                       |                                   |   |   |   |   |   |                              |
| Loves children                      |                                   |   |   |   |   |   |                              |
| Jealous                             |                                   |   |   |   |   |   |                              |
| Tactful                             |                                   |   |   |   |   |   |                              |
| Forceful                            |                                   |   |   |   |   |   |                              |
| Aggressive                          |                                   |   |   |   |   |   |                              |
| Compassionate                       |                                   |   |   |   |   |   |                              |
| Gentle                              |                                   |   |   |   |   |   |                              |
| Truthful                            |                                   |   |   |   |   |   |                              |
| Conventional                        |                                   |   |   |   |   |   |                              |

## Supplementary Table 2 – Ethnicity & Race of Participants

Data is reported in alphabetical order:

| Ethnicity of Participants                                                                                                                                                                                                                                                                                                                                                                                                                            | Race of Participants                                                                                                                                                                  |
|------------------------------------------------------------------------------------------------------------------------------------------------------------------------------------------------------------------------------------------------------------------------------------------------------------------------------------------------------------------------------------------------------------------------------------------------------|---------------------------------------------------------------------------------------------------------------------------------------------------------------------------------------|
| African Origins (n=5, 4%)                                                                                                                                                                                                                                                                                                                                                                                                                            | Asian (n=48, 37%)                                                                                                                                                                     |
| Asian Origins (n=54, 42%)                                                                                                                                                                                                                                                                                                                                                                                                                            | Black or African American (n=2, 2%)                                                                                                                                                   |
| European Origins (n=38, 29%)                                                                                                                                                                                                                                                                                                                                                                                                                         | Middle Eastern or North African (n=10, 8%)                                                                                                                                            |
| North American Origins (n=3, 2%)                                                                                                                                                                                                                                                                                                                                                                                                                     | White or Caucasian (n=60, 46%)                                                                                                                                                        |
| Mixed Ethnicity (n=30, 23%)<br>n=1 African & Asian Origins<br>n=1 African & European Origins<br>n=2 Asian, Caribbean, & European Origins<br>n=7 Asian & European Origins<br>n=1 Asian, European & Latin American Origins<br>n=1 Asian, European & Other North American Origins<br>n=2 Asian & North American Origins<br>n=1 Canadian-Punjabi/South Asian Origins<br>n=1 Caribbean & European Origins<br>n=13 European & Other North American Origins | Mixed Race (n=8, 6%)<br>n=6 Asian & European/Caucasian<br>n=1 Aboriginal & Caucasian<br>n=1 Not disclosed<br><br>Prefer to Self-Disclose (n=2)<br>n=1 Brown<br>n=1 Brown/South Indian |

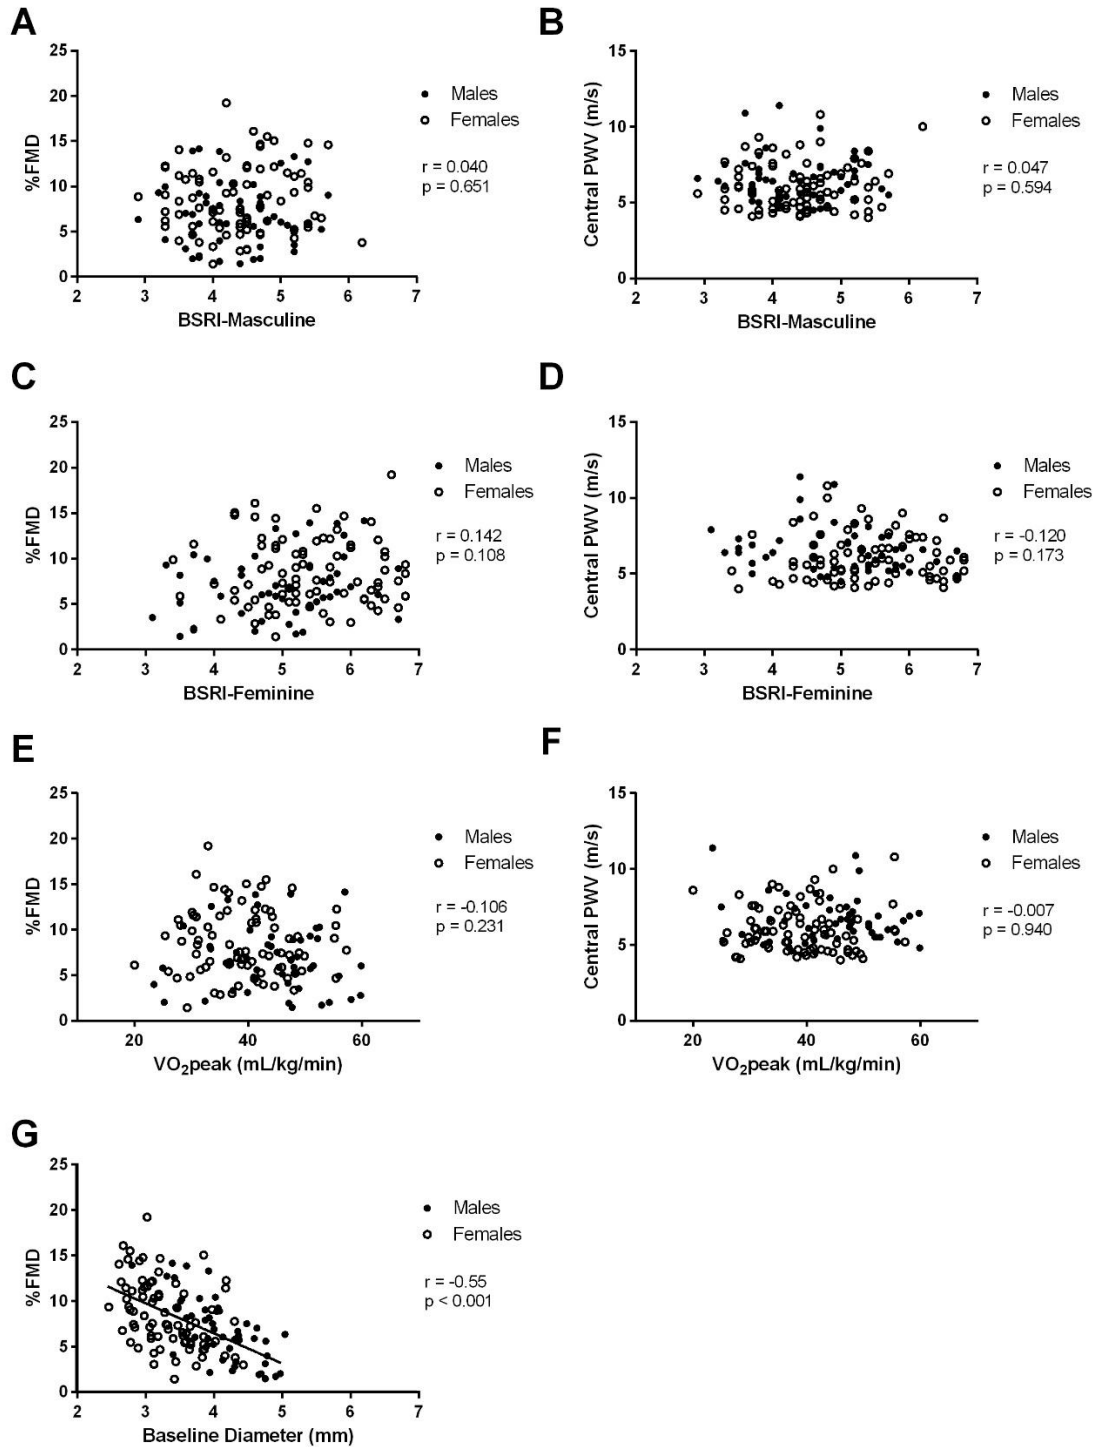

**Supplementary Figure 1. Relationships between %FMD or Central PWV and BSRI-Masculine, BSRI-Feminine, and  $\dot{V}O_{2peak}$ .** (A) Relationship between %FMD and BSRI-Masculine; (B) Relationship between Central PWV and BSRI-Masculine; (C) Relationship between %FMD and BSRI-Feminine; (D) Relationship between Central PWV and BSRI-Feminine; (E) Relationship between %FMD and  $\dot{V}O_{2peak}$ ; (F) Relationship between Central PWV and  $\dot{V}O_{2peak}$ ; (G) Relationship between %FMD and baseline diameter.
